# Supplementary material
Source: PubMed Central journal article supplement (PMC8513802)
Supplement: NIHMS1739840-supplement-6.pdf [file NIHMS1739840-supplement-6.pdf]

Figure S1 **A**

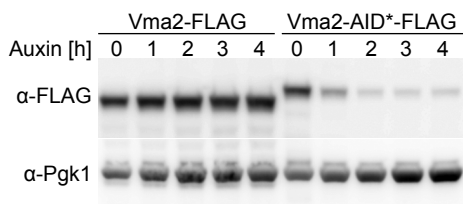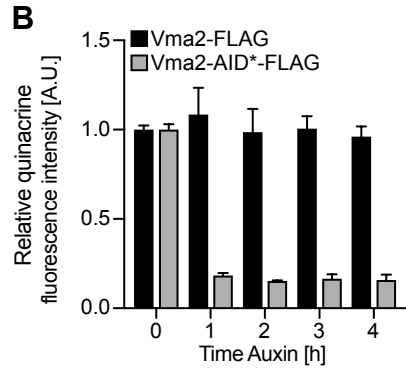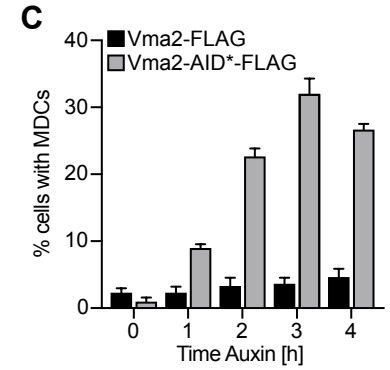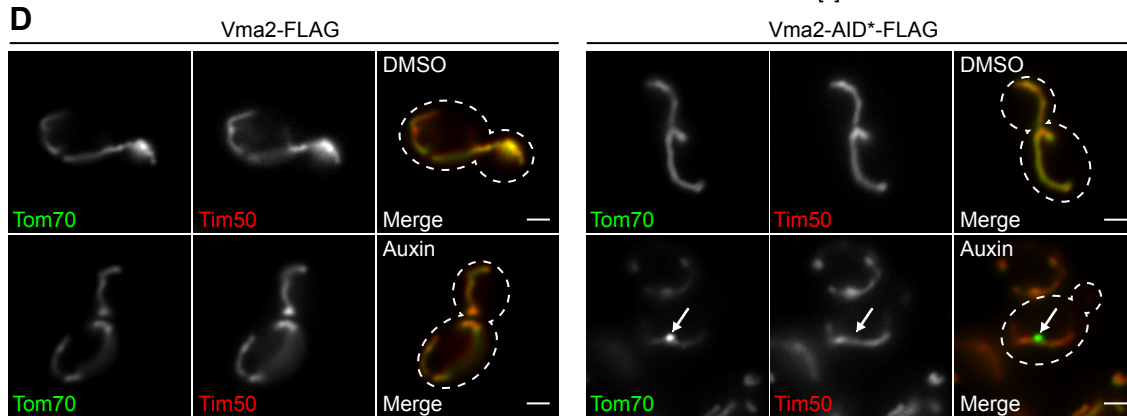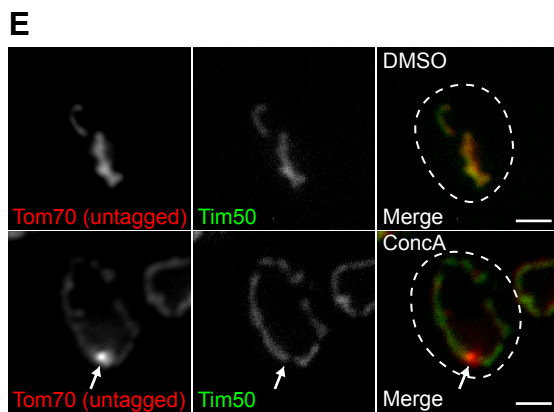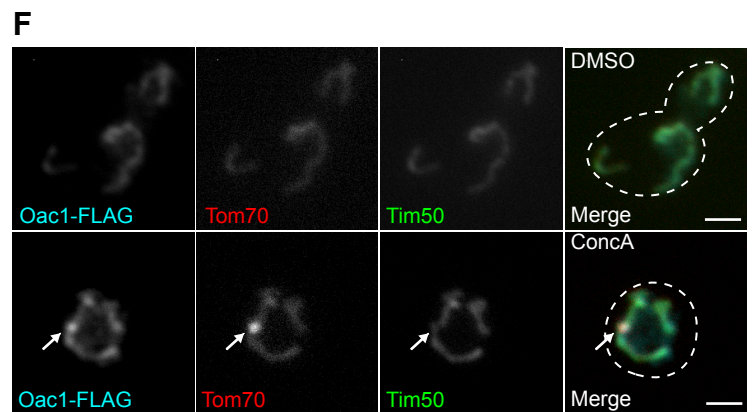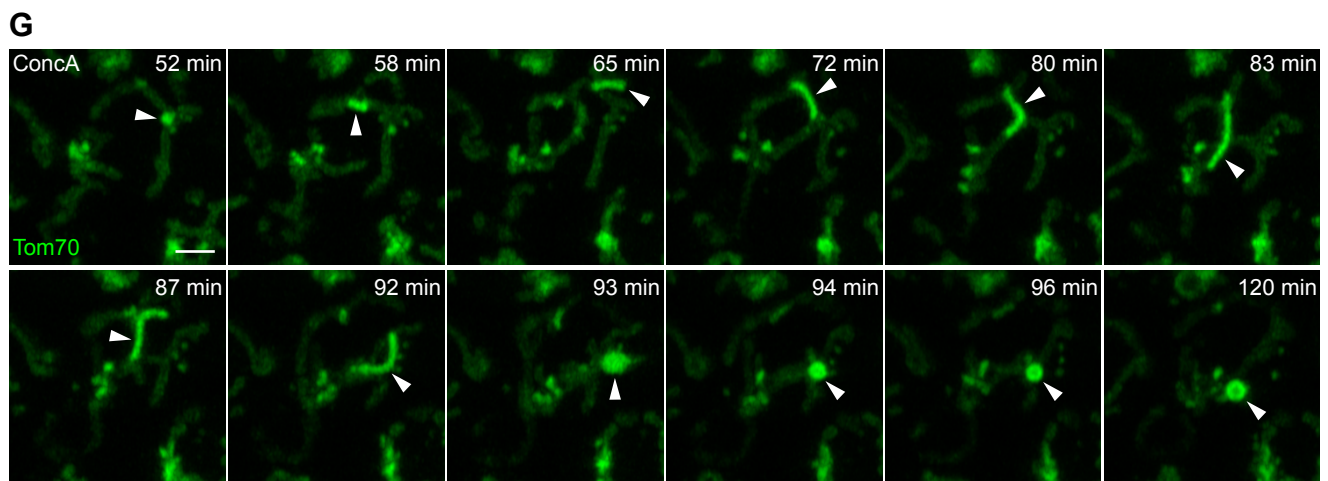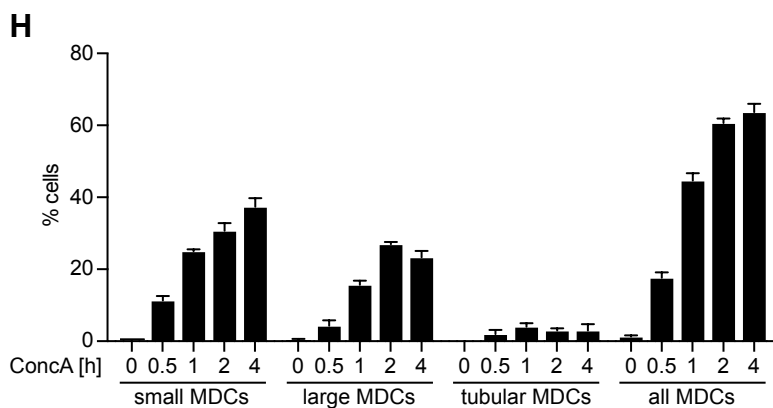

**Figure S1. V-ATPase Inhibition Induces MDC Formation, Related to Figure 1.**

(A) Western blot showing time course of auxin-induced Vma2-AID\*-FLAG depletion.

(B) Time course of auxin-induced inhibition of vacuole acidification due to Vma2-AID\*-FLAG depletion assayed by staining with pH-dependent dye quinacrine. Error bars show mean  $\pm$  standard error of  $N =$  three replicates with  $n = 30$  cells per replicate.

(C) Quantification of Vma2-AID\*-FLAG-depletion induced MDC formation over time. Error bars show mean  $\pm$  standard error of  $N =$  three replicates with  $n = 100$  cells per replicate.

(D) Widefield images of auxin-induced MDC formation in the indicated yeast strains expressing Tom70-GFP and Tim50-mCherry. White arrow marks MDC. Scale bar =  $2 \mu\text{m}$ .

(E) Widefield image of concanamycin A (ConcA) treated yeast cells expressing Tim50-GFP fixed and stained for endogenous, untagged Tom70. White arrow marks MDC. Scale bar =  $2 \mu\text{m}$ .

(F) Widefield image of ConcA treated yeast cells expressing Oac1-FLAG, Tom70-mCherry and Tim50-GFP fixed and stained for FLAG. White arrow marks MDC. Scale bar =  $2 \mu\text{m}$ .

(G) Time-lapse images of ConcA-induced MDC formation in yeast cells expressing Tom70-GFP. Images were acquired over 120 minutes (min). Arrowhead marks MDC. Scale bar =  $2 \mu\text{m}$ .

(H) Time-course analysis of MDC morphology in ConcA treated cells. Error bars show mean  $\pm$  standard error of  $N =$  three replicates with  $n = 100$  cells per replicate.

Figure S2 **A**

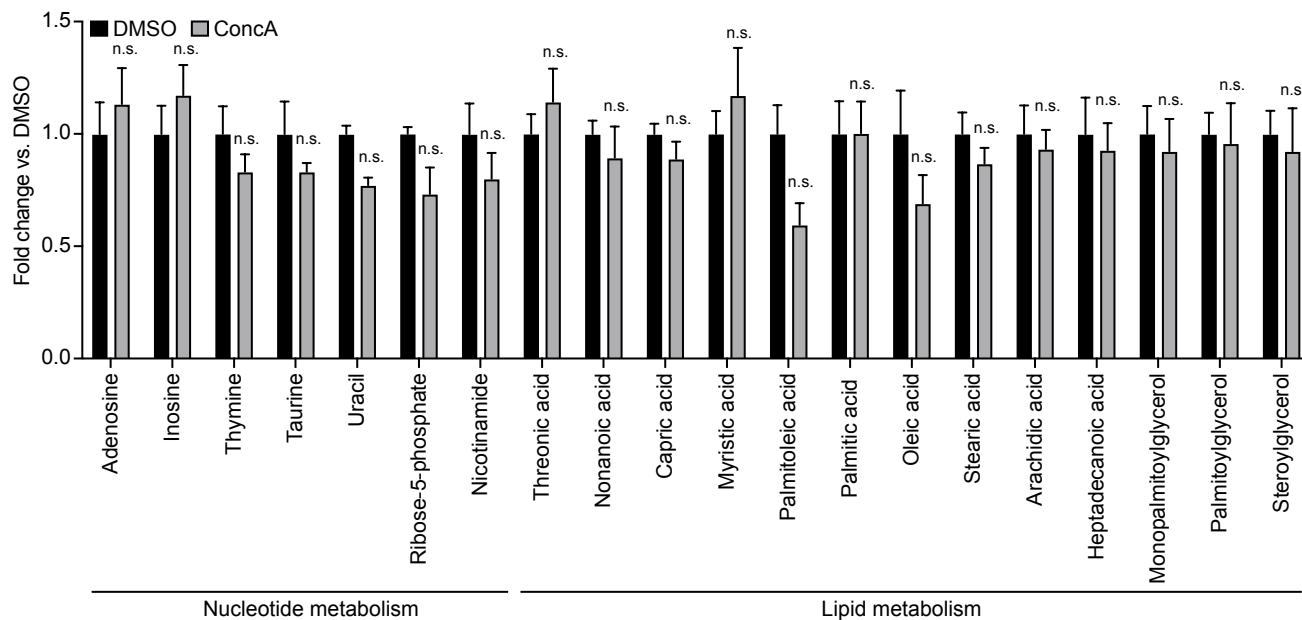

**B**

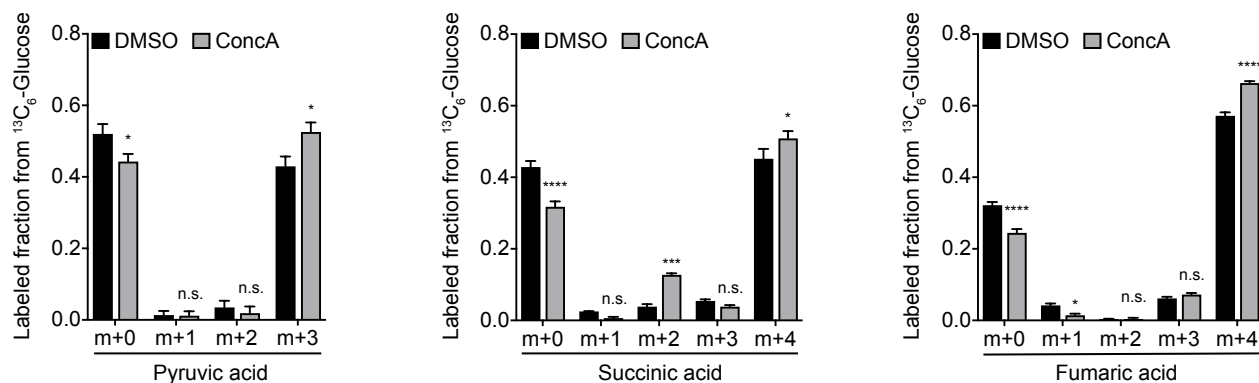

**C**

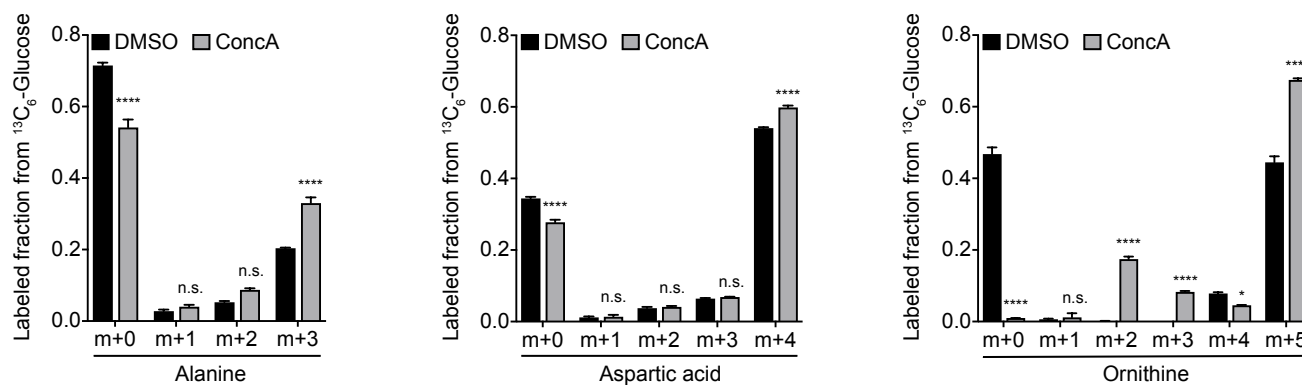

**D**

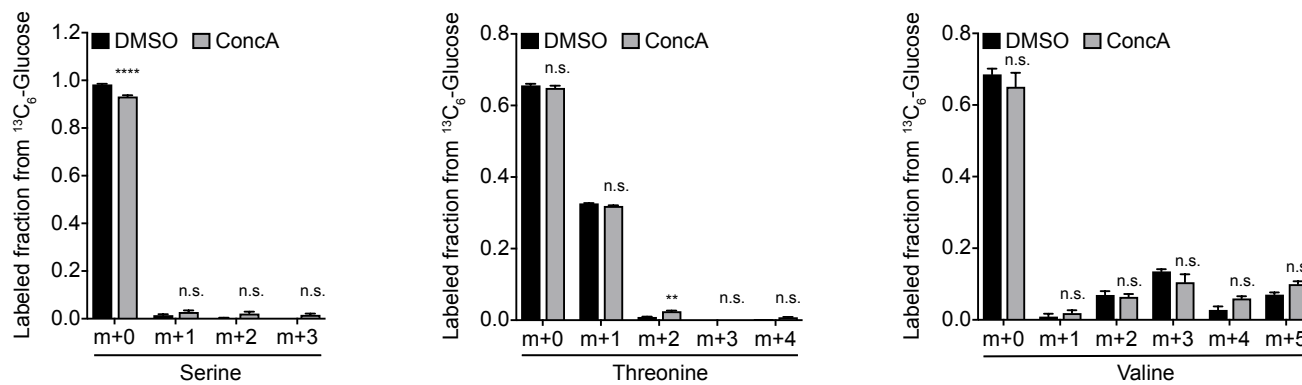

**Figure S2. Metabolic remodeling in ConcA treated cells, Related to Figure 2.**

(A) Analysis of whole cell metabolite levels in *wild-type* cells treated with concanamycin A (ConcA) for three hours. Error bars show mean  $\pm$  standard error of  $N =$  four replicates. Statistical comparison shows difference to the corresponding DMSO control. n.s., not significant, two-way ANOVA with Holm-Šídák test.

(B) Analysis of  $^{13}\text{C}$ -labeling of pyruvic acid, succinic acid, and fumaric acid from glucose carbons in *wild-type* cells treated for three hours with ConcA in the presence of  $^{13}\text{C}_6$ -glucose. Error bars show mean fraction labeled  $\pm$  standard error of  $N =$  four replicates. Statistical comparison shows difference to the corresponding DMSO control. n.s., not significant, \* $p < 0.0333$ , \*\*\* $p < 0.0002$ , \*\*\*\* $p < 0.0001$ , two-way ANOVA with Holm-Šídák test.

(C) Analysis of  $^{13}\text{C}$ -labeling of alanine, aspartic acid, and ornithine from glucose carbons in *wild-type* cells treated for three hours with ConcA in the presence of  $^{13}\text{C}_6$ -glucose. Error bars show mean fraction labeled  $\pm$  standard error of  $N =$  four replicates. Statistical comparison shows difference to the corresponding DMSO control. n.s., not significant, \* $p < 0.0333$ , \*\*\*\* $p < 0.0001$ , two-way ANOVA with Holm-Šídák test.

(D) Analysis of  $^{13}\text{C}$ -labeling of serine, threonine, and valine from glucose carbons in *wild-type* cells treated for three hours with ConcA in the presence of  $^{13}\text{C}_6$ -glucose. Error bars show mean fraction labeled  $\pm$  standard error of  $N =$  four replicates. Statistical comparison shows difference to the corresponding DMSO control. n.s., not significant, \*\* $p < 0.0022$ , \*\*\*\* $p < 0.0001$ , two-way ANOVA with Holm-Šídák test.

Figure S3

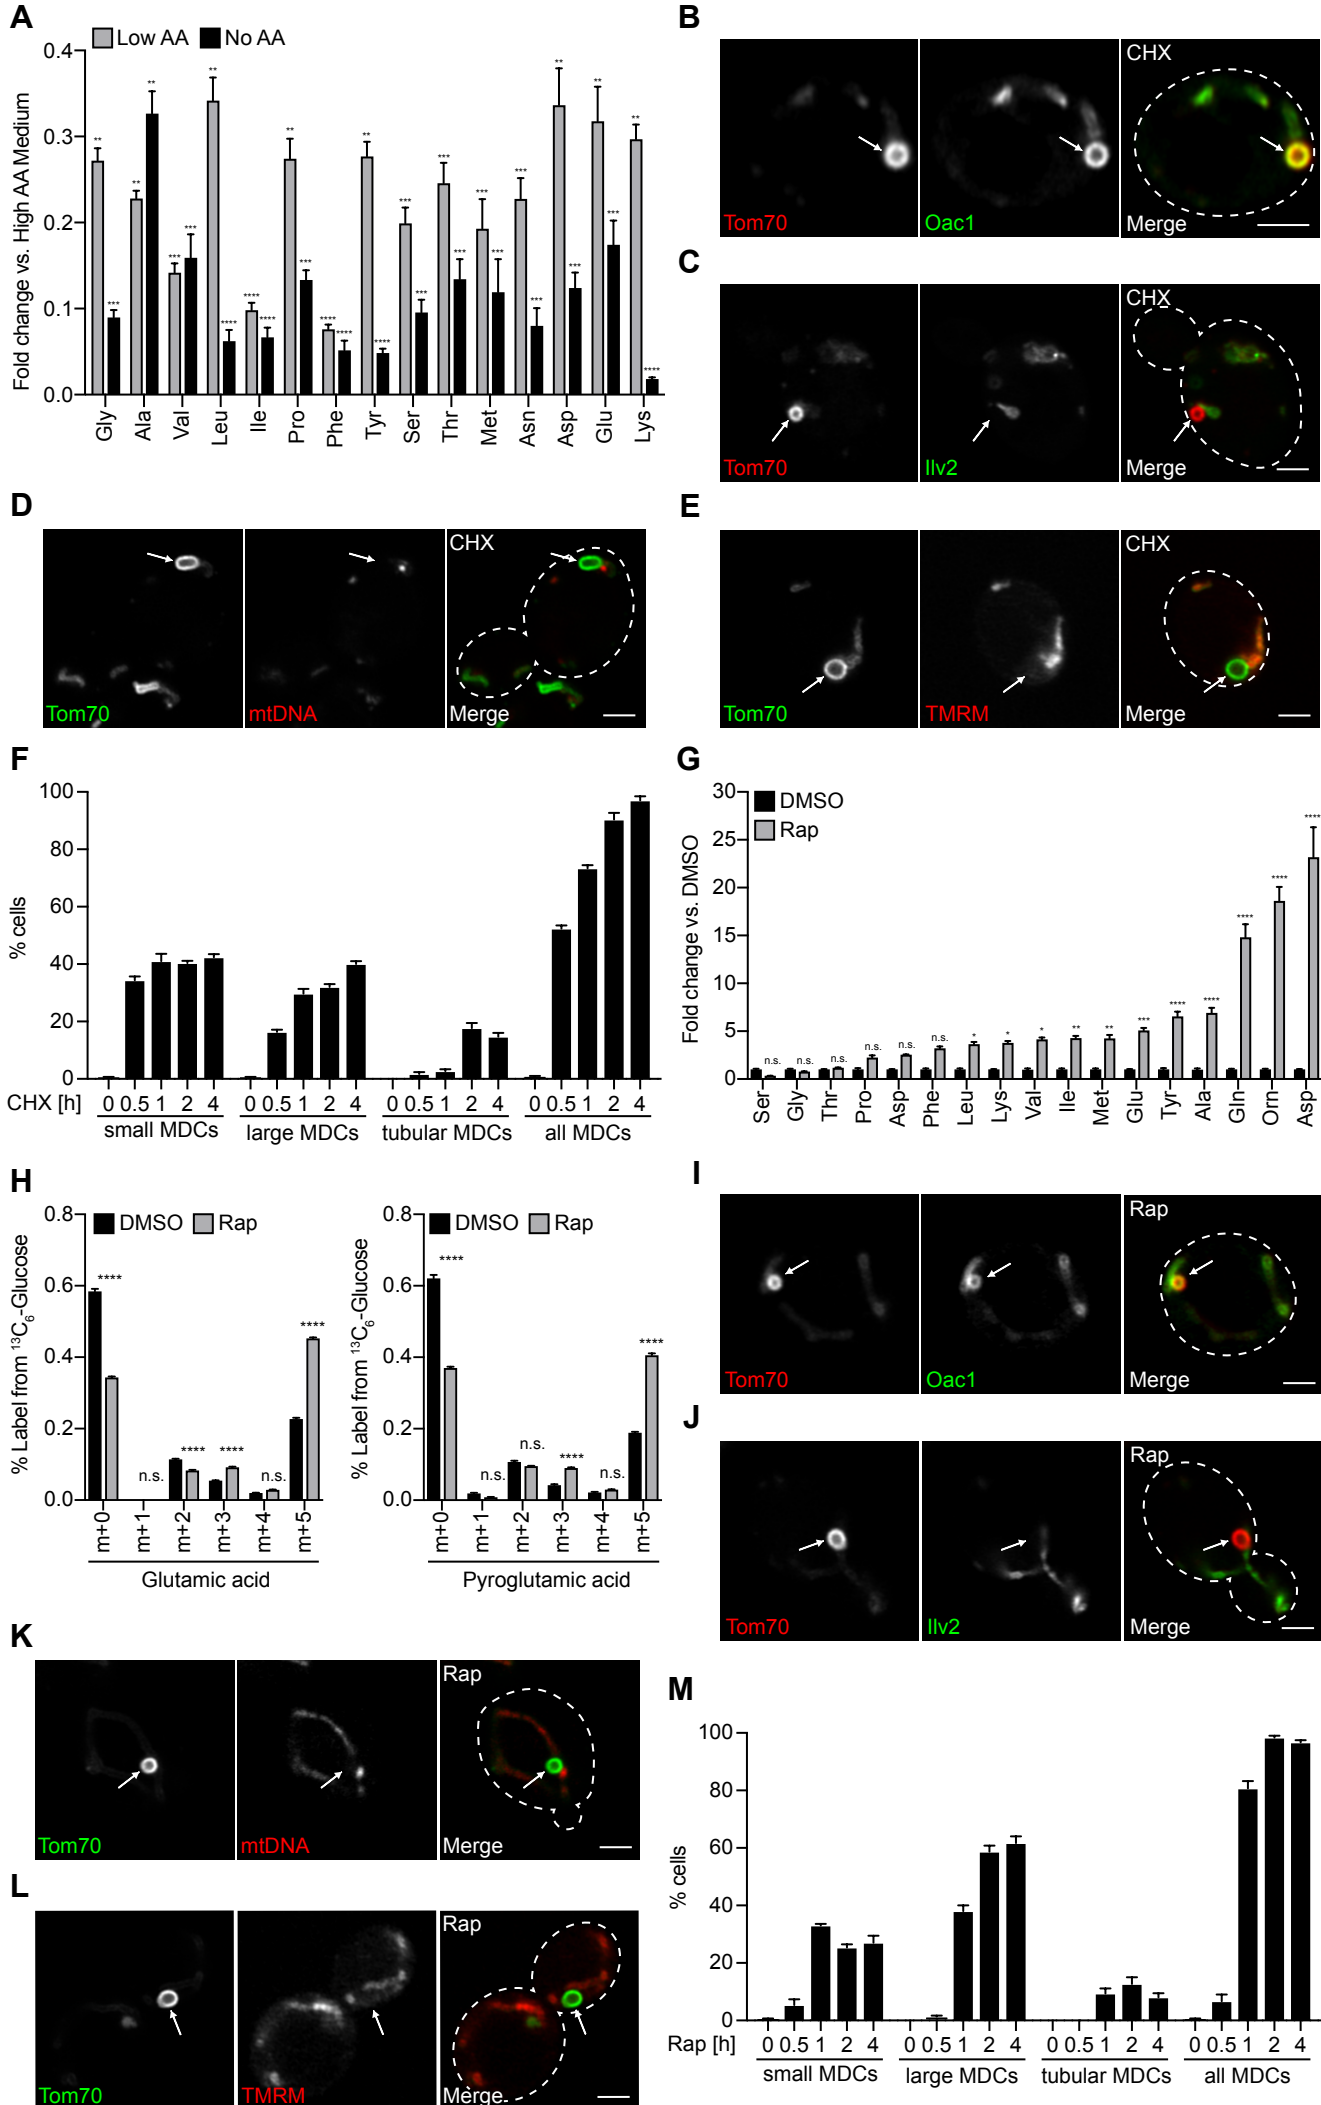

**Figure S3. Characteristics of CHX- and Rap-induced MDCs, Related to Figure 3.**

(A) Relative amino acid levels in yeast cells grown in media containing low or no amino acids (AA) compared to high AA medium assayed by GC-MS. Error bars show mean  $\pm$  standard error of  $N =$  three replicates. Statistical comparison shows difference to high AA media. \*\* $p < 0.0022$ , \*\*\* $p < 0.0002$ , \*\*\*\* $p < 0.0001$ , two-way ANOVA with Holm-Šídák test.

(B) Super-resolution image of cycloheximide (CHX) treated yeast cells expressing Oac1-GFP and Tom70-mCherry. White arrow marks MDC. Scale bar = 2  $\mu\text{m}$ .

(C) Super-resolution image of CHX treated yeast cells expressing Ilv2-GFP and Tom70-mCherry. White arrow marks MDC. Scale bar = 2  $\mu\text{m}$ .

(D) Super-resolution images of CHX treated yeast cells expressing Tom70-GFP, stained with DAPI to label mitochondrial DNA. White arrow marks MDC. Scale bar = 2  $\mu\text{m}$ . % of MDCs with DAPI =  $0 \pm 0.33$ ,  $N = 3$  replicates, 50 MDCs ( $n$ ) analyzed per replicate (mean  $\pm$  standard error).

(E) Super-resolution images of CHX treated yeast cells expressing Tom70-GFP stained with fluorescent membrane potential indicator TMRM. White arrow marks MDC. Scale bar = 2  $\mu\text{m}$ . % of MDCs with TMRM =  $0 \pm 0.02$ ,  $N = 3$  replicates, 30 MDCs ( $n$ ) analyzed per replicate (mean  $\pm$  standard error).

(F) Time-course analysis of MDC morphology in CHX treated cells. Error bars show mean  $\pm$  standard error of  $N =$  three replicates with  $n = 100$  cells per replicate.

(G) Relative amino acid levels in yeast cells grown in high amino acid medium and treated with rapamycin (Rap) assayed by GC-MS. Error bars show mean  $\pm$  standard error of  $N =$  three replicates. Statistical comparison shows difference to the corresponding DMSO control. n.s., not significant, \* $p < 0.0333$ , \*\* $p < 0.0022$ , \*\*\* $p < 0.0002$ , \*\*\*\* $p < 0.0001$ , two-way ANOVA with Holm-Šídák test.

(H) Analysis of  $^{13}\text{C}$ -labeling of glutamic acid and pyroglutamic acid from glucose carbons in *wild-type* cells treated for three hours with Rap in the presence of  $^{13}\text{C}_6$ -glucose. Error bars show mean fraction labeled  $\pm$  standard error of  $N =$  four replicates. Statistical comparison shows difference to the corresponding DMSO control. n.s., not significant, \*\*\*\* $p < 0.0001$ , two-way ANOVA with Holm-Šídák test.

(I) Super-resolution image of Rap treated yeast cells expressing Oac1-GFP and Tom70-mCherry. White arrow marks MDC. Scale bar = 2  $\mu$ m.

(J) Super-resolution image of Rap treated yeast cells expressing Ilv2-GFP and Tom70-mCherry. White arrow marks MDC. Scale bar = 2  $\mu$ m.

(K) Super-resolution images of Rap treated yeast cells expressing Tom70-GFP, stained with DAPI to label mitochondrial DNA. White arrow marks MDC. Scale bar = 2  $\mu$ m. % of MDCs with DAPI =  $0 \pm 0$ , N = 3 replicates, 50 MDCs (n) analyzed per replicate (mean  $\pm$  standard error).

(L) Super-resolution images of Rap treated yeast cells expressing Tom70-GFP stained with fluorescent membrane potential indicator TMRM. White arrow marks MDC. Scale bar = 2  $\mu$ m. % of MDCs with TMRM =  $0.01 \pm 0.33$ , N = 3 replicates, 50 MDCs (n) analyzed per replicate (mean  $\pm$  standard error).

(M) Time-course analysis of MDC morphology in Rap treated cells. Error bars show mean  $\pm$  standard error of N = three replicates with n = 100 cells per replicate.

Figure S4

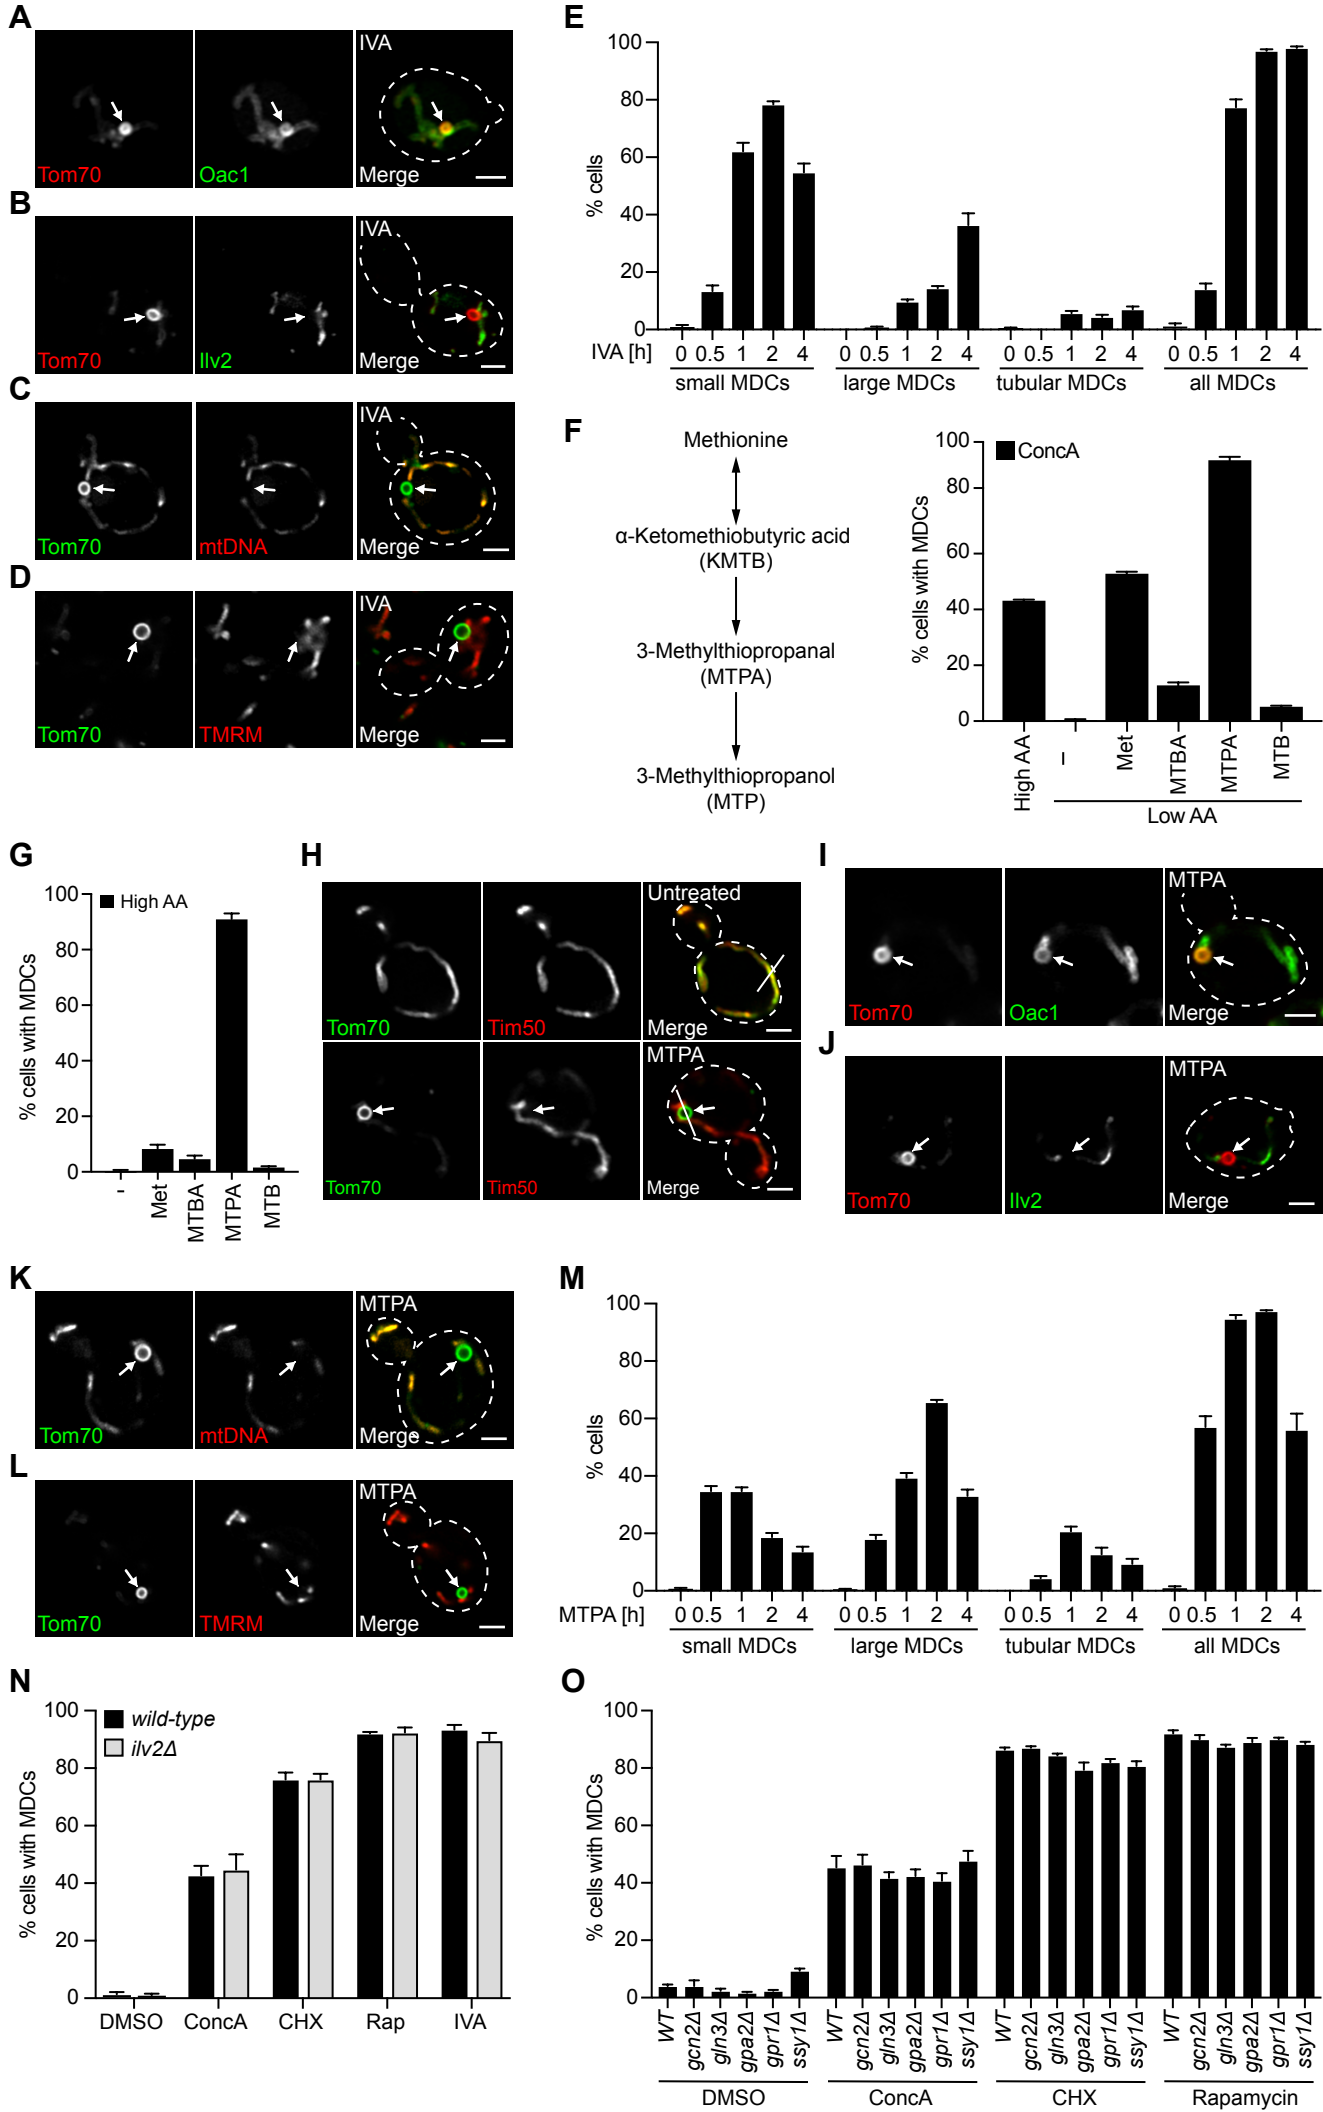



**Figure S4. Leucine and Methionine Derivatives Activate MDC Formation, Related to Figure 4.**

(A) Super-resolution images isovaleraldehyde (IVA)-induced MDC formation in yeast cells expressing Tom70-mCherry and Oac1-GFP. White arrow marks MDC. Scale bar = 2  $\mu$ m.

(B) Super-resolution images IVA-induced MDC formation in yeast cells expressing Tom70-mCherry and Ilv2-GFP. White arrow marks MDC. Scale bar = 2  $\mu$ m.

(C) Super-resolution images IVA-induced MDC formation in yeast cells expressing Tom70-GFP, stained with DAPI to label mitochondrial DNA. White arrow marks MDC. Scale bar = 2  $\mu$ m.

(D) Super-resolution images IVA-induced MDC formation in yeast cells expressing Tom70-GFP stained with fluorescent membrane potential indicator TMRM. White arrow marks MDC. Scale bar = 2  $\mu$ m.

(E) Time-course analysis of MDC morphology in IVA treated cells. Error bars show mean  $\pm$  standard error of  $N =$  three replicates with  $n = 100$  cells per replicate.

(F) Quantification of concanamycin A (ConcA)-induced MDC formation in low amino acid medium supplemented with methionine (Met) or its catabolites  $\alpha$ -ketomethiobutyric acid (KMTB), 3-methylthiopropional (MTPA) or 3-methylthiopropanol (MTP). Error bars show mean  $\pm$  standard error of  $N =$  three replicates with  $n = 100$  cells per replicate.

(G) Quantification of MDC formation in high amino acid medium supplemented with Met, KMTB, MTPA or MTP in the absence of drug treatment. Error bars show mean  $\pm$  standard error of  $N =$  three replicates with  $n = 100$  cells per replicate.

(H) Super-resolution images of MTPA-induced MDC formation in yeast cells expressing Tom70-GFP and Tim50-mCherry. White arrow marks MDC. Scale bar = 2  $\mu$ m.

(I) Super-resolution images of MTPA treated yeast cells expressing Tom70-mCherry and Oac1-GFP. White arrow marks MDC. Scale bar = 2  $\mu$ m.

(J) Super-resolution images of MTPA-induced MDC formation in yeast cells expressing Tom70-mCherry and Ilv2-GFP. White arrow marks MDC. Scale bar = 2  $\mu$ m.

(K) Super-resolution images of MTPA-induced MDC formation in yeast cells expressing Tom70-GFP, stained with DAPI to label mitochondrial DNA. White arrow marks MDC. Scale bar = 2  $\mu$ m.

(L) Super-resolution images of MTPA-induced MDC formation in yeast cells expressing Tom70-GFP stained with fluorescent membrane potential indicator TMRM. White arrow marks MDC. Scale bar = 2  $\mu$ m.

(M) Time-course analysis of MDC morphology in MTPA treated cells. Error bars show mean  $\pm$  standard error of  $N =$  three replicates with  $n = 100$  cells per replicate.

(N) Quantification of ConcA-, cycloheximide (CHX)-, rapamycin (Rap)-, and IVA-induced MDC formation in *wild-type* and *ilv2 $\Delta$*  cells. Error bars show mean  $\pm$  standard error of  $N =$  three replicates with  $n = 100$  cells per replicate.

(O) Quantification of ConcA-, CHX-, and Rap-induced MDC formation in *wild-type*, *gcn2 $\Delta$* , *gln3 $\Delta$* , *ilv2 $\Delta$* , *gpa2 $\Delta$* , *gpr1 $\Delta$* , and *ssy1 $\Delta$*  cells. Error bars show mean  $\pm$  standard error of  $N =$  three replicates with  $n = 100$  cells per replicate.

Figure S5 A

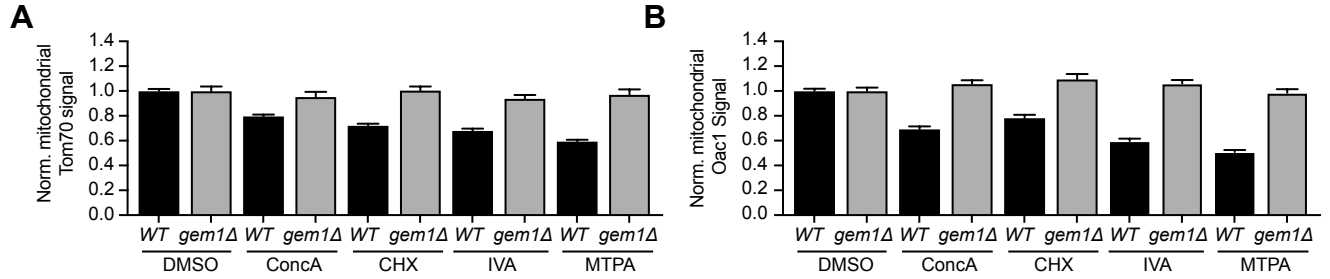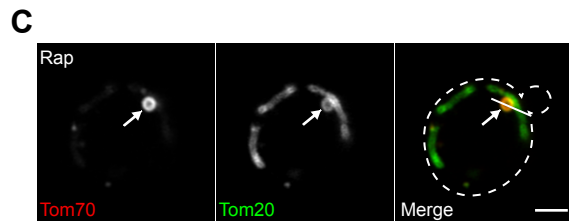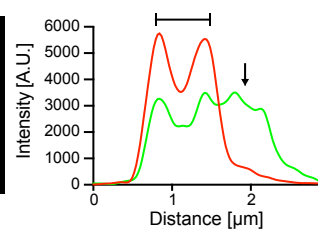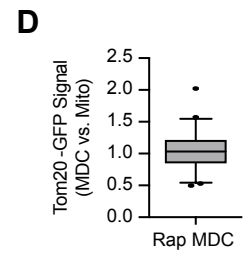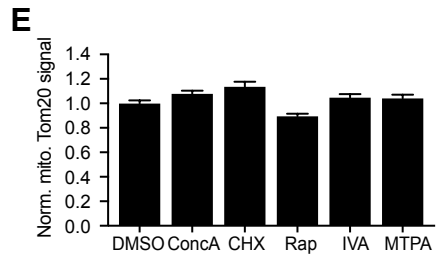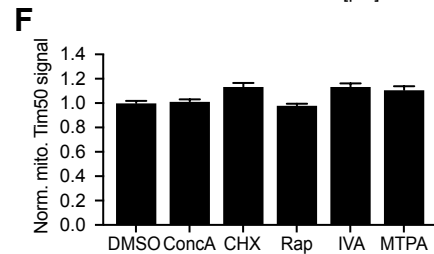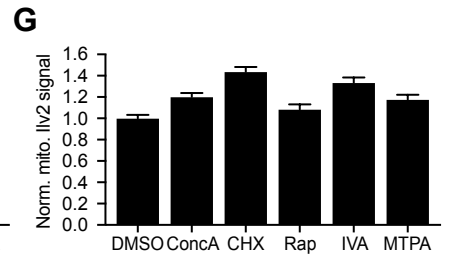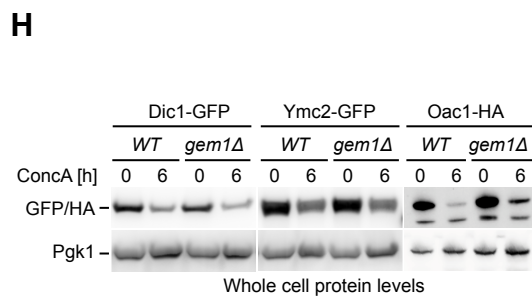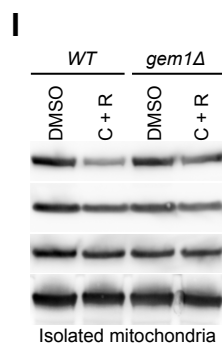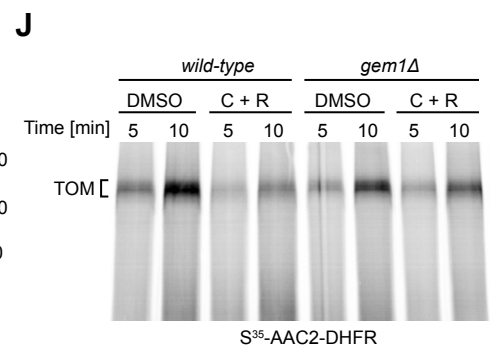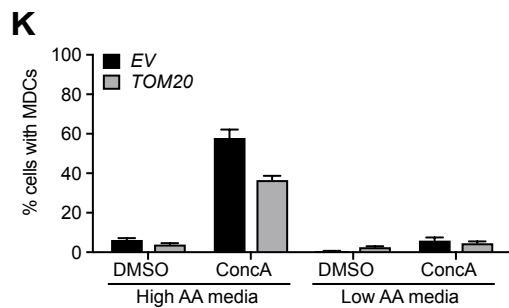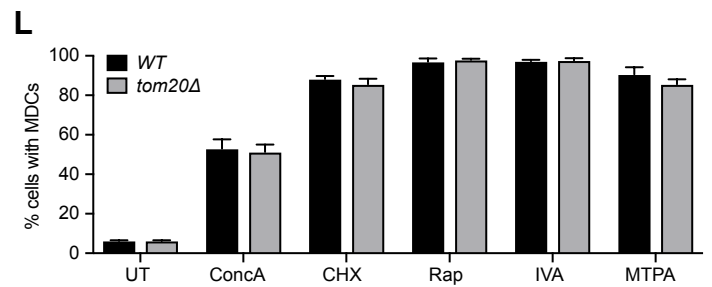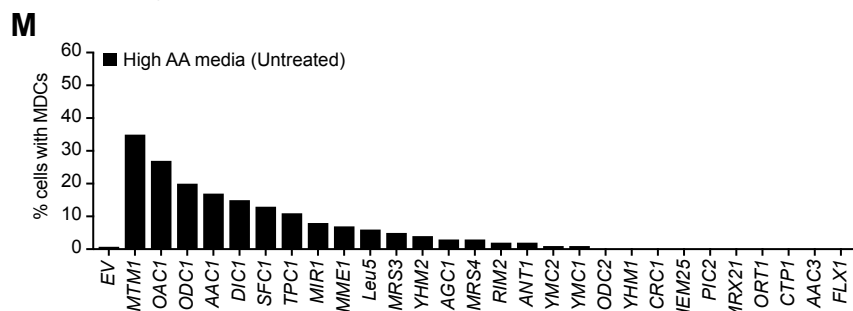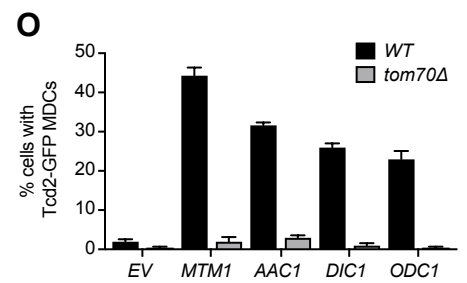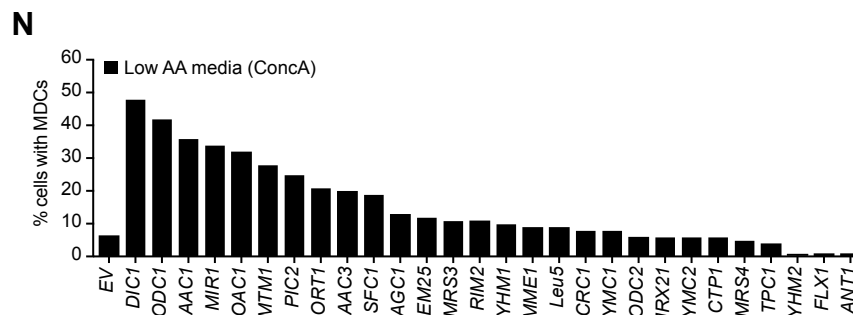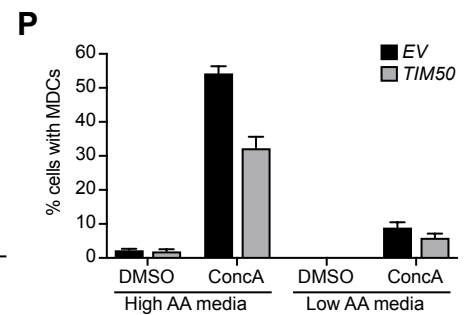

**Figure S5. MDCs Selectively Remove Tom70 and SLC25A Carrier Proteins From Mitochondria, Related to Figure 5.**

(A) Normalized mitochondrial Tom70-GFP fluorescence in *wild-type* (*WT*) and *gem1* $\Delta$  cells treated with concanamycin A (ConcA), cycloheximide (CHX), isovaleraldehyde (IVA), or 3-methylthiopropional (MTPA) compared to DMSO. Error bars show mean  $\pm$  standard error of  $N =$  three replicates with  $n = 15$  cells per replicate. This graph shows additional data generated in the experiments used for the related panel in Figure 5E.

The DMSO control is duplicated from Figure 5E for comparison purposes.

(B) Normalized mitochondrial Oac1-GFP fluorescence in *WT* and *gem1* $\Delta$  cells treated with ConcA, CHX, IVA, or 3- MTPA compared to DMSO. Error bars show mean  $\pm$  standard error of  $N =$  three replicates with  $n = 15$  cells per replicate. This graph shows additional data generated in the experiments used for the related panel in Figure 5F.

The DMSO control is duplicated from Figure 5F for comparison purposes.

(C) Super-resolution images (left) and line-scan analysis (right) of rapamycin (Rap)-induced MDC formation in yeast cells expressing Tom70-mCherry and Tom20-GFP.

White arrow marks MDC. White line marks fluorescence intensity profile position. Black arrow marks mitochondrial tubule. Bracket marks MDC. Scale bar = 2 $\mu$ m.

(D) Box plot showing the normalized fluorescence intensity of Tom20-GFP in Rap-induced MDCs compared to the adjacent mitochondrial tubule. Error bars show median  $\pm$  95 % confidence interval of  $n = 45$  cells from  $N =$  three per replicates with  $n = 15$  cells per replicate.

(E) Normalized mitochondrial Tom20-GFP fluorescence in cells treated with ConcA, CHX, Rap, IVA, or MTPA compared to DMSO. Error bars show mean  $\pm$  standard error of  $N =$  three replicates with  $n = 15$  cells per replicate.

(F) Normalized mitochondrial Tim50-GFP fluorescence in cells treated with ConcA, CHX, Rap, IVA, or MTPA compared to DMSO. Error bars show mean  $\pm$  standard error of  $N =$  three replicates with  $n = 15$  cells per replicate.

(G) Normalized mitochondrial Ilv2-GFP fluorescence in cells treated with ConcA, CHX, Rap, IVA, or MTPA compared to DMSO. Error bars show mean  $\pm$  standard error of  $N =$  three replicates with  $n = 15$  cells per replicate.

(H) Whole cell protein steady state levels in *WT* and *gem1* $\Delta$  cells treated with ConcA.

(I) Protein steady state levels in mitochondria isolated from *WT* and *gem1* $\Delta$  cells treated with a combination of ConcA and Rap (C + R) for six hours.

(J) Binding of <sup>35</sup>S-AAC2-DHFR to the translocase of the outer membrane (TOM) complex of mitochondria isolated from *WT* and *gem1* $\Delta$  cells treated with C + R.

(K) Quantification of ConcA-induced MDC formation in *TOM20* overexpressing or empty vector (*EV*) control cells in high and low amino acid (AA) media. Error bars show mean  $\pm$  standard error of  $N =$  three replicates with  $n = 100$  cells per replicate.

(L) Quantification of ConcA, CHX, Rap, IVA, and MTPA-induced MDC formation in *WT* and *tom20* $\Delta$  cells. Error bars show mean  $\pm$  standard error of  $N =$  three replicates with  $n = 100$  cells per replicate.

(M) Quantification of MDC formation in cells expressing the indicated mitochondrial carrier in high AA media in absence of drug treatment.

(N) Quantification of MDC formation in cells expressing the indicated mitochondrial carrier in low AA media in presence of ConcA.

(O) Quantification of MDC formation in *WT* and *tom70* $\Delta$  cells expressing the indicated carrier protein or *EV* control grown in high AA media in absence of drug treatment. Error bars show mean  $\pm$  standard error of  $N =$  three replicates with  $n = 100$  cells per replicate.

(P) Quantification of ConcA-induced MDC formation in *TIM50* overexpressing or *EV* control cells in high and low AA media. Error bars show mean  $\pm$  standard error of  $N =$  three replicates with  $n = 100$  cells per replicate.

Figure S6 A

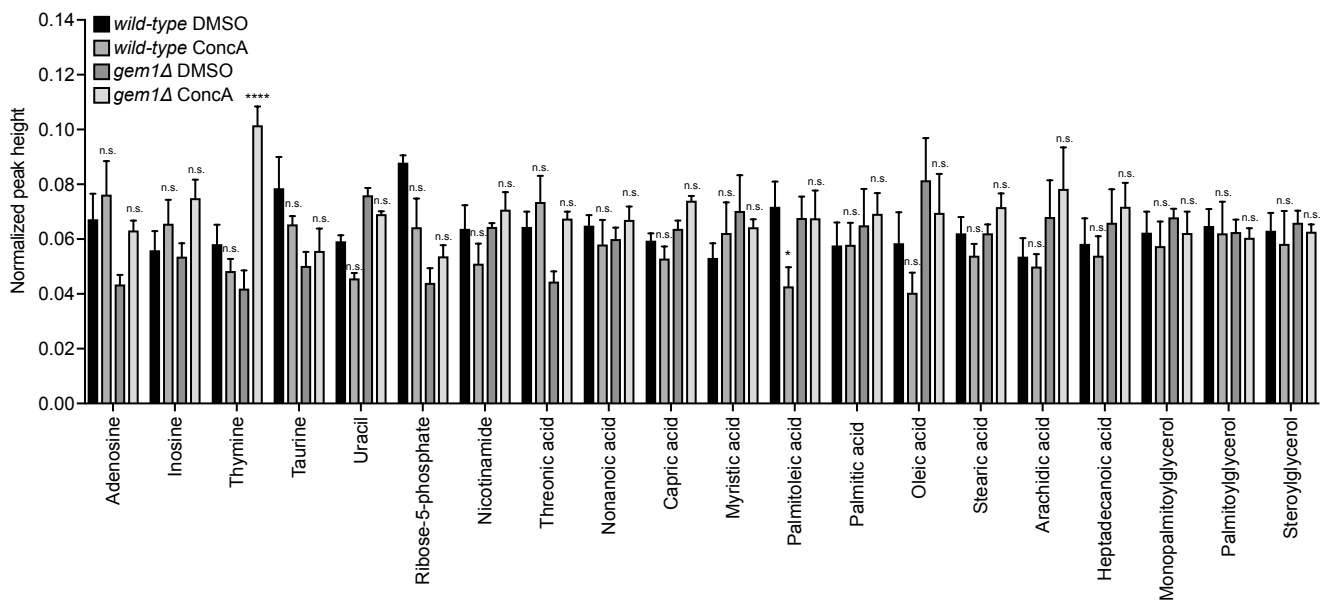

B

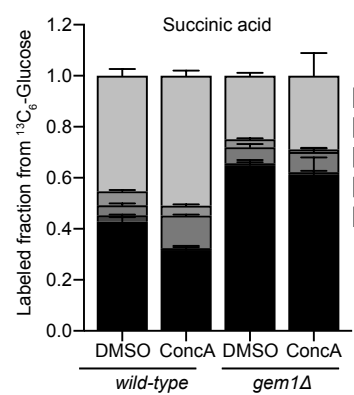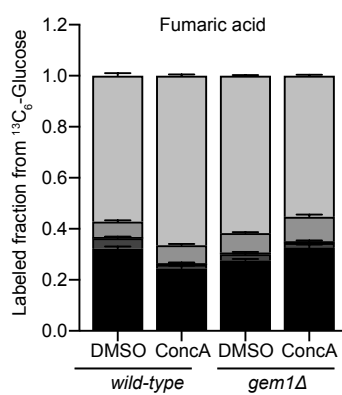

C

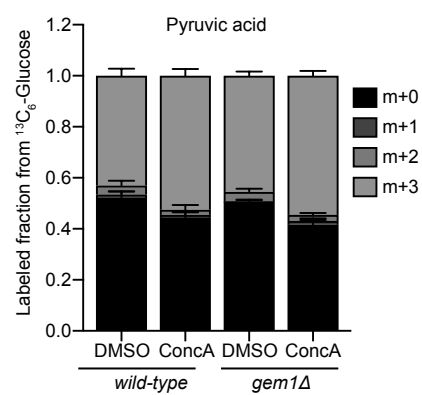

D

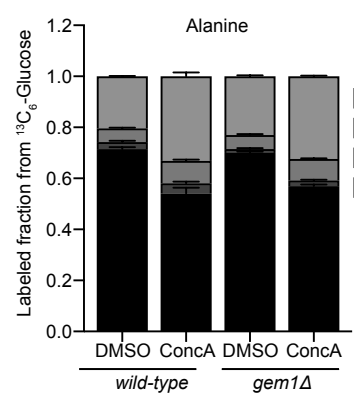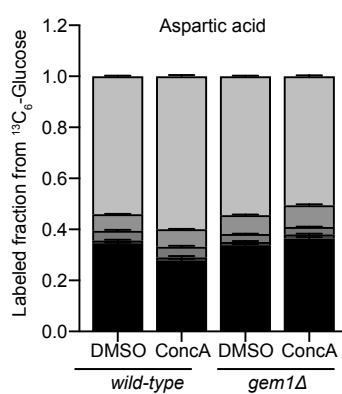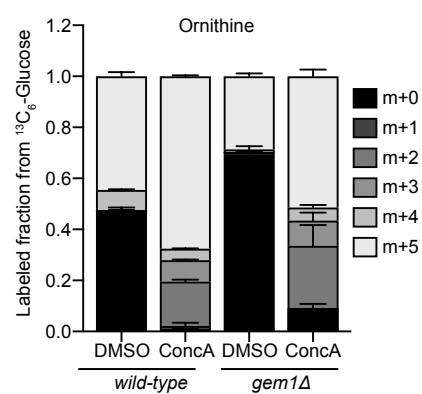

E

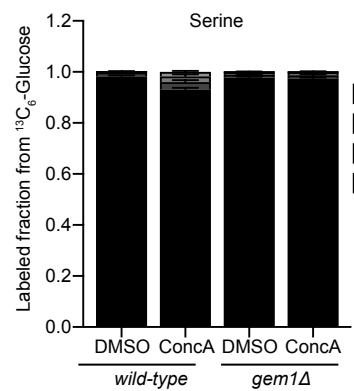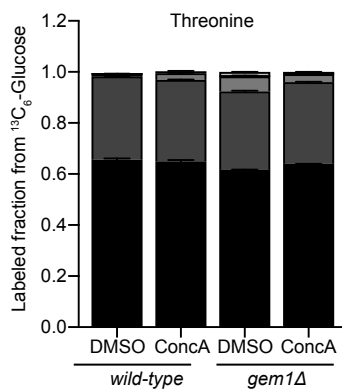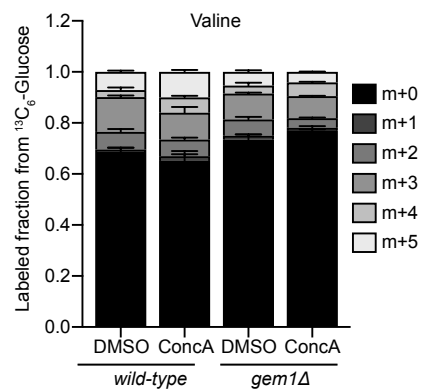

**Figure S6. MDC Formation Promotes Cellular Metabolic Remodeling in V-ATPase Inhibited Cells, Related to Figure 6.**

(A) Normalized metabolite levels in *wild-type* (*WT*) and *gem1* $\Delta$  cells treated with concanamycin A (ConcA) for three hours. This graph shows additional data generated in the experiments used for Supplemental Figure S2A. *WT* control graphs show the same data as in Supplemental Figure S2A but normalized to the sum of all corresponding metabolite intensity levels (peak heights) to allow for better comparison to *gem1* $\Delta$  cells. Error bars show mean  $\pm$  standard error of  $N =$  four replicates. Statistical comparison shows difference to the corresponding DMSO control. n.s., not significant, \* $p < 0.0333$ , \*\*\*\* $p < 0.0001$ , two-way ANOVA with Holm-Šídák test.

(B) Analysis of  $^{13}\text{C}$ -labeling of succinic acid and fumaric acid from glucose carbons in *wild-type* and *gem1* $\Delta$  cells treated for three hours with ConcA in the presence of  $^{13}\text{C}_6$ -glucose. This graph shows additional data generated in the experiments used for Supplemental Figure SB. *WT* control graphs were duplicated for comparison. Error bars show mean fraction labeled  $\pm$  standard error of  $N =$  four replicates.

(C) Analysis of  $^{13}\text{C}$ -labeling of pyruvic acid from glucose carbons in *wild-type* and *gem1* $\Delta$  cells treated for three hours with ConcA in the presence of  $^{13}\text{C}_6$ -glucose. This graph shows additional data generated in the experiments used for Supplemental Figure SB. *WT* control graphs were duplicated for comparison. Error bars show mean fraction labeled  $\pm$  standard error of  $N =$  four replicates.

(D) Analysis of  $^{13}\text{C}$ -labeling of alanine, aspartic acid, and ornithine from glucose carbons in *wild-type* and *gem1* $\Delta$  cells treated for three hours with ConcA in the presence of  $^{13}\text{C}_6$ -glucose. This graph shows additional data generated in the experiments used for Supplemental Figure S2C. *WT* control graphs were duplicated for comparison. Error bars show mean fraction labeled  $\pm$  standard error of  $N =$  four replicates.

(E) Analysis of  $^{13}\text{C}$ -labeling of serine, threonine, and valine from glucose carbons in *wild-type* and *gem1* $\Delta$  cells treated for three hours with ConcA in the presence of  $^{13}\text{C}_6$ -glucose. This graph shows additional data generated in the experiments used for Supplemental Figure S2D. *WT* control graphs were duplicated for comparison. Error bars show mean fraction labeled  $\pm$  standard error of  $N =$  four replicates.

Figure S7 A

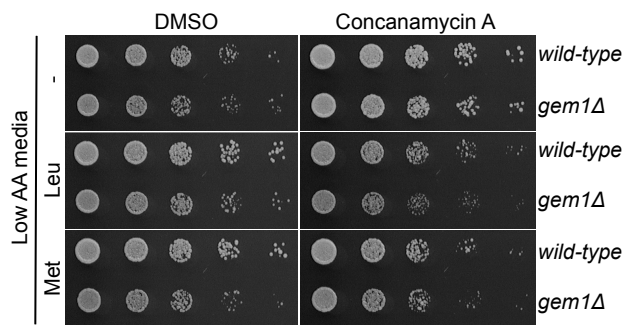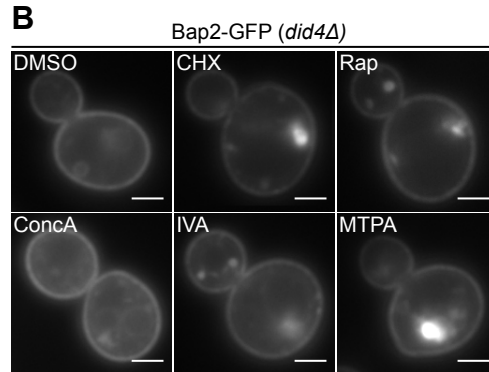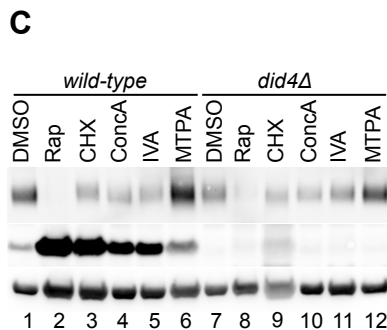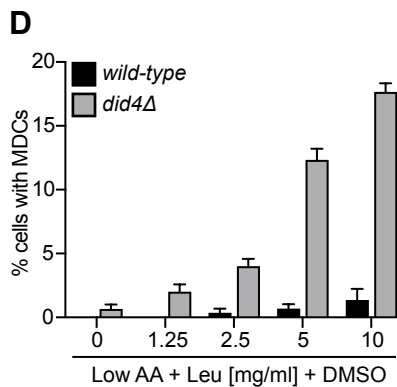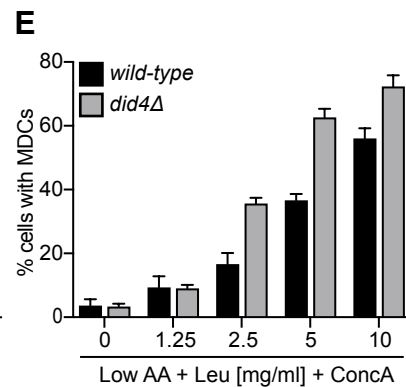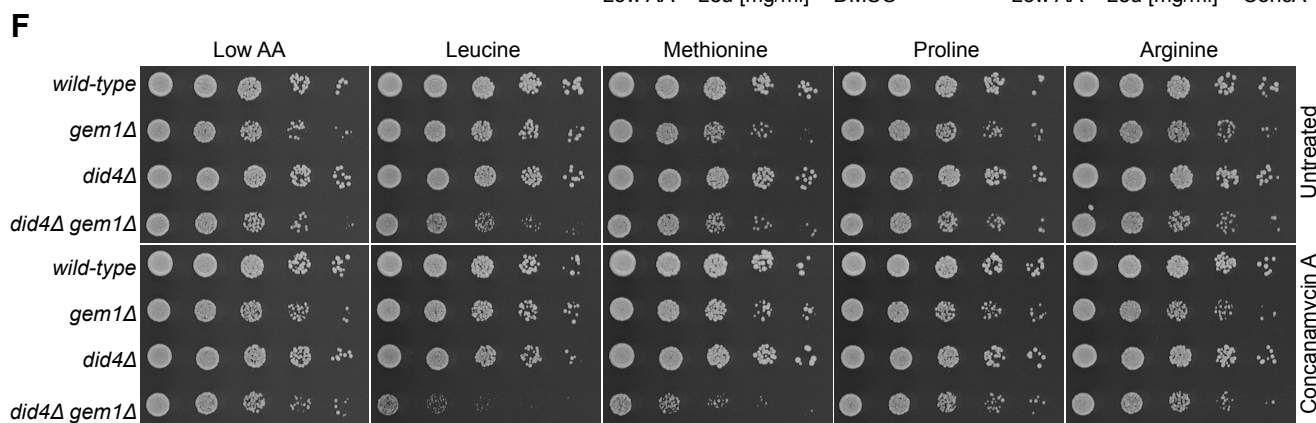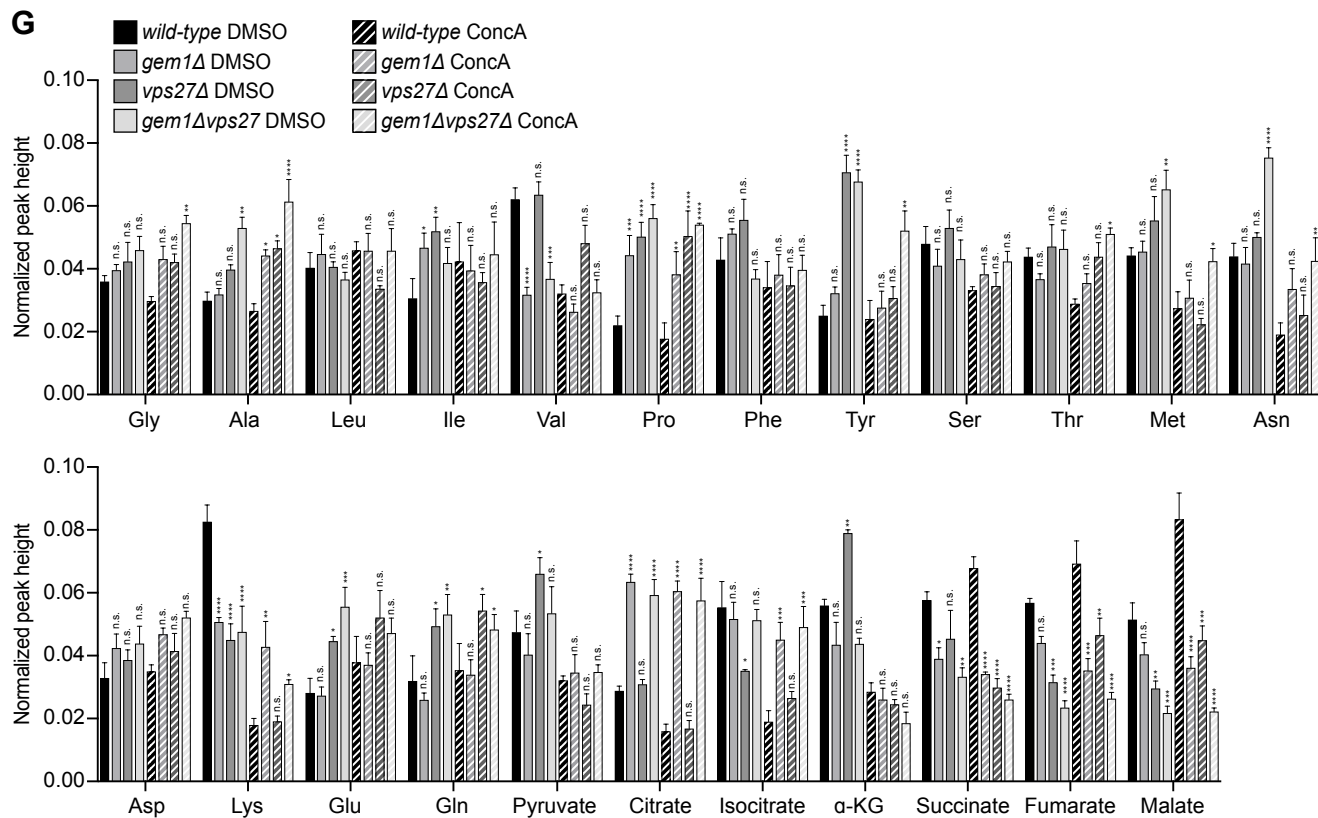



**Figure S7. MDCs Cooperate with MVBs to Protect Cells from Amino Acid Toxicity, Related to Figure 7.**

(A) Growth of *wild-type* and *gem1* $\Delta$  cells in presence and absence of concanamycin A (ConcA) on low amino acid media supplemented with 10mg/ml leucine or methionine.

(B) Widefield images showing stabilization of Bap2-GFP on the plasma membrane in rapamycin (Rap), cycloheximide (CHX), ConcA, isovaleraldehyde (IVA) or 3-methylthiopropional (MTPA) treated *did4* $\Delta$  cells. Bright structures resemble typical class E compartments found in ESCRT mutants. Scale bar = 2  $\mu$ m.

(C) Western blot analysis of Bap2-GFP clipping upon treatment with Rap, CHX, ConcA, IVA and MTPA in *wild-type* and *did4* $\Delta$  cells.

(D) Quantification of MDC formation in low amino acid media supplemented with the indicated amount of leucine in *wild-type* (*WT*) and *did4* $\Delta$  cells. Error bars show mean  $\pm$  standard error of  $N =$  three replicates with  $n = 100$  cells per replicate.

(E) Quantification of ConcA-induced MDC formation in low amino acid media supplemented with the indicated amount of leucine in *wild-type* (*WT*) and *did4* $\Delta$  cells. Error bars show mean  $\pm$  standard error of  $N =$  three replicates with  $n = 100$  cells per replicate.

(F) Growth of *wild-type*, *gem1* $\Delta$ , *did4* $\Delta$  and *gem1* $\Delta$  *did4* $\Delta$  strains in presence and absence of ConcA on low amino acid media supplemented with 10mg/ml leucine, methionine, proline or arginine.

(G) Normalized whole cell amino acid and TCA cycle metabolite abundance in *wild-type*, *gem1* $\Delta$ , *vps27* $\Delta$  and *gem1* $\Delta$  *vps27* $\Delta$  strains grown in low amino acid medium, shifted to low amino acid medium supplemented with 10mg/ml leucine and treated with DMSO or ConcA. Error bars show mean fraction labeled  $\pm$  standard error of  $N =$  three replicates. Statistical comparison shows difference to the corresponding *wild-type* control. n.s., not significant, \* $p < 0.0333$ , \*\* $p < 0.0022$ , \*\*\* $p < 0.0002$ , \*\*\*\* $p < 0.0001$ , two-way ANOVA with Holm-Šídák test.
